# Supplementary material for: First photosynthetic characterization of the giant kelp Macrocystis pyrifera from the Comau Fjord, Northern Patagonia region
Source: Research Square preprint supplement (doi:10.21203/rs.3.rs-6456951/v1), 2025-04-17
Supplement: Supplementary file 1 [file 93b18df36ac660b9ed7876e2.docx]

**Supplementary material**


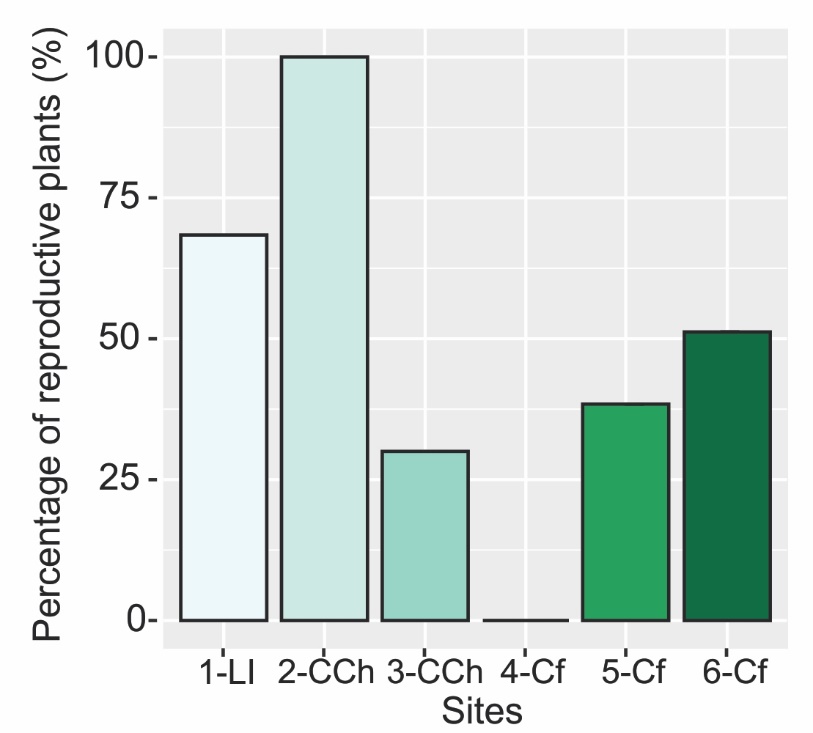


**Fig. S1** Analysis of percentage of reproductive individuals of *M. pyrifera* from different sites along the Comau Fjord. Abbreviations: Lilihuapi Island (**1-LI**), Cahuelmo sector (**2-CCh**, **3-CCh**), Comau Fjord interior (**4-Cf**, **5-Cf** and **6-Cf**). Values are means ± C.I., n= 126.


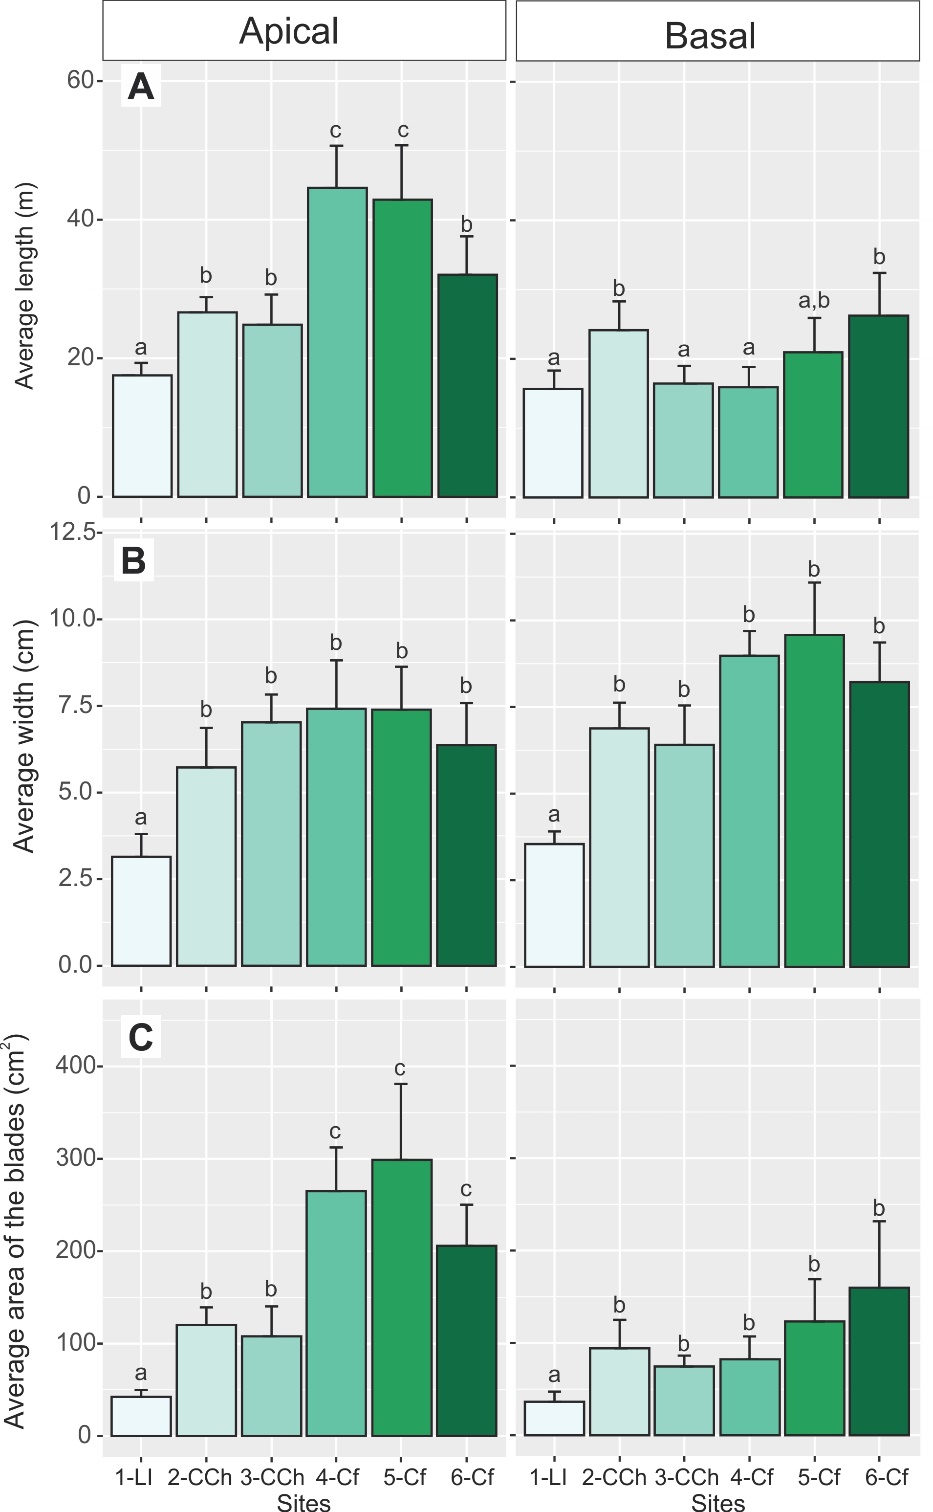


**Fig. S2** Variation in (A) length (m), (B) width (cm), and (C) area (cm2) for blade type (Apical and Basal) of *M. pyrifera* in the different sites along the Comau Fjord. Abbreviations: Lilihuapi Island (**1-Li**), Cahuelmo sector (**2-CCh**, **3-CCh**), Comau Fjord inside (**4-Cf**, **5-Cf** and **6-Cf**). Values are means ± C.I., n= 196. Different letters denote significant mean differences (*p* < 0.05) among means according to post hoc Tukey's HSD test.


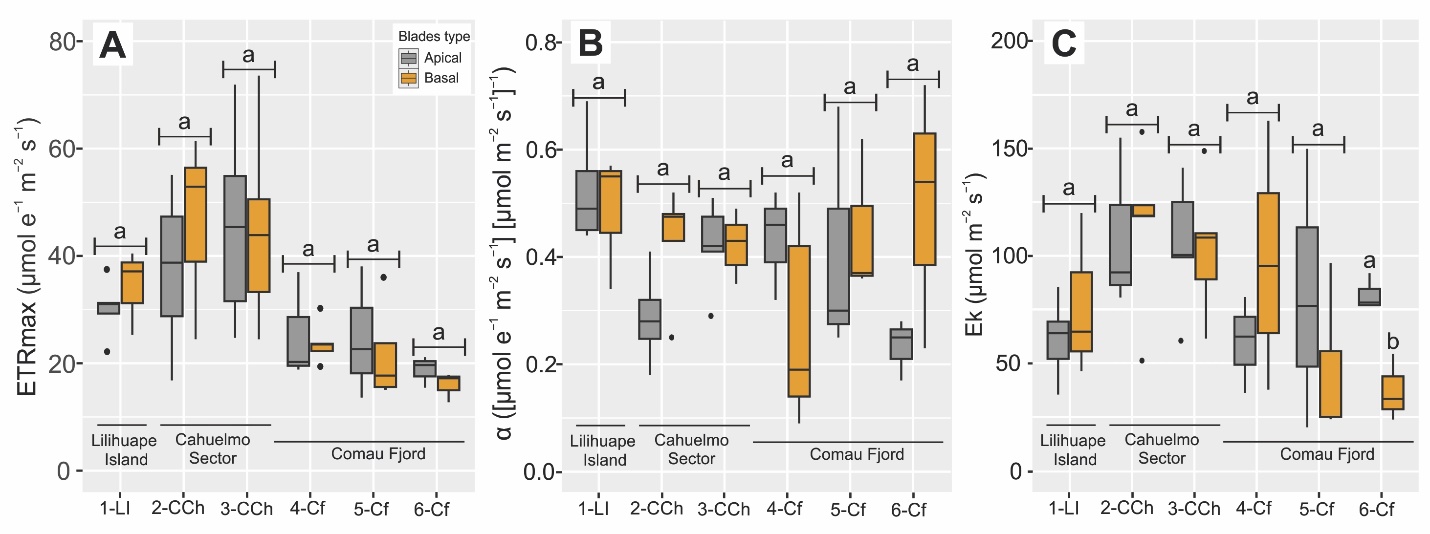


**Fig. S3** Photochemical characterization of *M. pyrifera* based on fluorescence at different sites along a Comau fjord measured in situ using a Diving-PAM according to blade type (Apical and Basal). ETR-based P-E curve parameters, (**A**) Electron Transfer Rate-ETRmax, (**B**) Photosynthetic efficiency-α, and (**C**) Photochemical Saturation-Ek. All recorded parameters correspond to mean values ± CI (n= 8). Abbreviations: Lilihuapi Island (**1-Li**), Cahuelmo sector (**2-CCh**, **3-CCh**), Comau Fjord inside (**4-Cf**, **5-Cf** and **6-Cf**). Different letters denote significant mean differences (*p* < 0.05) among means according to post hoc Tukey's HSD test.

**Table S1** Results of the analysis of morphometric characteristics at (**A**) individual level of total length (m), wet biomass (kg/ind.), diameter and height maximum of holdfast (cm), number of stipes, reproductive condition and (**B**) blades morphological characteristics of *M. pyrifera* from different sampling sites along the Comau Fjord. Abbreviations: Lilihuapi Island (**1-LI**), Cahuelmo sector (**2-CCh**, **3-CCh**), Comau Fjord interior (**4-Cf**, **5-Cf** and **6-Cf**). Values are means ± C.I., n= 126. Different letters denote significant mean differences (*p* < 0.05) among means according to post hoc Tukey's HSD test.

| A) Morphological Thallu, n = 126 | | |  |  |  |  |  |
| --- | --- | --- | --- | --- | --- | --- | --- |
| **Sites** |  | **1-Li** | **2-CCh** | **3-CCh** | **4-Cf** | **5-Cf** | **6-Cf** |
| Number plants | | 19 | 7 | 21 | 25 | 13 | 41 |
| **Size (m)** | | 0.71 ± 0.12 (a) | 3.19 ± 0.24(b) | 0.98 ± 0.21(a) | 1.12 ± 0.23(a) | 1.35 ± 0.31(a) | 1.31 ± 0.27(a) |
| **Wet biomass (g)** | | 58.95 ± 18.24 (a) | 554.70 ± 158.52(b) | 103.82 ± 42.27(a) | 80.96 ± 22.13(a) | 158.05 ± 86.81(a) | 206.31 ± 76.21(a) |
| **Maximun holdfast diamter (cm)** | | 2.18 ± 0.25(a,b) | 2.97 ± 0.53(a) | 1.63 ± 0.32(b,c) | 1.86 ± 0.38(a,c) | 2.70 ± 0.81(a,b) | 1.94 ± 0.41(a,b,c) |
| **Maximum holdfast height (cm)** | | 0.91 ± 0.14(a) | 1.75 ± 0.54(b) | 1.10 ± 0.22(a,b) | 1.26 ± 0.21(a,b) | 1.79 ± 0.56(a,b) | 1.18 ± 0.27(a,b) |
| **Number stipes** | | 2.31 ± 0.39(a,b) | 3.71 ± 0.45(a) | 3.66 ± 0.85(a) | 1.95 ± 0.33(b) | 2.66 ± 0.78(a,b) | 3.08 ± 0.68(a) |
| **Reproductive State (%)** | | 68.4 | 100 | 30 | 0 | 38.4 | 51.2 |
| B) Morphological Blades, n = 196 | |  |  |  |  |  |  |
| **Sites** |  | **1-Li** | **2-CCh** | **3-CCh** | **4-Cf** | **5-Cf** | **6-Cf** |
| Number blades |  | 37 | 39 | 34 | 27 | 26 | 29 |
| **Blade Length (cm)** | Apical | 17.52 ± 1.81(a) | 26.61 ± 2.19(b) | 24.84 ± 4.35(b) | 44.59 ± 6.08(c) | 42.88 ± 7.85(c) | 32.04 ± 5.54(b) |
| Basal | 15.67 ± 2.63(a) | 24.14 ± 4.15(b) | 16.43 ± 2.55(a) | 15.90 ± 2.90(a) | 20.94 ± 4.98(a,b) | 26.23 ± 6.17(b) |
| All | 17.02 ± 1.46(a) | 25.72 ± 1.97(b,c) | 20.39 ± 2.75(a,c) | 29.72 ± 6.53(b) | 31.91 ± 6.24(b) | 29.84 ± 4.06(b) |
| **Blade Width (cm)** | Apical | 3.54 ± 0.36(a) | 6.88 ± 0.74(b) | 6.40 ± 1.13(b) | 8.97 ± 0.71(b) | 9.58 ± 1.51(b) | 8.21 ± 1.14(b) |
| Basal | 3.14 ± 0.65(a) | 5.72 ± 1.14(a) | 7.02 ± 0.80(b) | 7.41 ± 1.40(b) | 7.39 ± 1.23(b) | 6.36 ± 1.21(b) |
| All | 3.43 ± 0.30(a) | 6.46 ± 0.62(b) | 6.73 ± 0.65(b) | 8.16 ± 0.81(c) | 8.48 ± 1.01(c) | 7.51 ± 0.86(b,c) |
| **Blade Area (cm2)** | Apical | 42.31 ±7.55(a) | 120.23 ± 18.99(b) | 107.82 ± 32.46(b) | 265.016 ± 47.36(c) | 298.86 ± 82.23(c) | 205.80 ± 44.52(c) |
| Basal | 36.26 ± 10.97(a) | 94.18 ± 30.79(b) | 74.48 ± 11.79(b) | 82.22 ± 24.77(b) | 123.18 ± 45.76(b) | 159.74 ± 71.93(b) |
| All | 40.68 ± 6.05(a) | 110.88 ± 16.11(b) | 90.17 ± 16.59(b) | 170.23 ± 44.08(c) | 211.02 ± 56.64(c) | 188.33 ± 37.03(c) |

**Table S2** Results of the statistical analysis for the comparison between the type blades (Apical and Basal) of *M. pyrifera* from the different sampling sites in Comau Fjord considering their morphometry (n= 196 blades). Abbreviations: Lilihuapi Island (**1-LI**), Cahuelmo sector (**2-CCh**, **3-CCh**), Comau Fjord interior (**4-Cf**, **5-Cf** and **6-Cf**). Results of one-factor ANOVA (α = 0.05) are included. *DF degrees of freedom, SE standard error, MS mean squares, F F statistic; p values in bold indicate significant differences (*p* < 0.05).

| **Variable** |  | ANOVA | | | | |
| --- | --- | --- | --- | --- | --- | --- |
|  | | DF | SE | MS | F | Pr(>F) |
| Blades type | 1-Li x length | 35 | 4.3660 | 0.03631 | 1.3190 | 0.2586 |
| 1-Li x width | 35 | 0.9218 | 0.0373 | 1.3570 | 0.2519 |
| 1-Li x area | 35 | 18.2100 | 0.0225 | 0.8060 | 0.3754 |
| 2-CCh x length | 38 | 5.9680 | 0.0392 | 1.5490 | 0.2210 |
| 2-CCh x width | 38 | 1.8400 | 0.08584 | 3.568 | 0.0665 |
| 2-CCh x area | 38 | 48.1200 | 0.06332 | 2.569 | 0.1173 |
| 3-CCh x length | 32 | 6.7370 | 0.2916 | 13.17 | **0.0010** |
| 3-CCh x width | 32 | 0.1139 | 0.04031 | 1.344 | 0.2549 |
| 3-CCh x area | 32 | 0.1937 | 0.09847 | 3.495 | 0.0707 |
| 4-Cf x length | 25 | 7.8610 | 0.7822 | 89.8 | **< 0.0001** |
| 4-Cf x width | 25 | 1.9300 | 0.1501 | 4.414 | **0.0459** |
| 4-Cf x area | 25 | 62.5100 | 0.6975 | 57.64 | **< 0.0001** |
| 5-Cf x length | 24 | 0.1545 | 0.5423 | 28.43 | **< 0.0001** |
| 5-Cf x width | 24 | 2.287 | 0.1986 | 5.948 | **0.0225** |
| 5-Cf x area | 24 | 0.2408 | 0.4579 | 20.27 | **0.0001** |
| 6-Cf x length | 27 | 0.06311 | 0.1536 | 1.819 | 0.1887 |
| 6-Cf x width | 27 | 0.1117 | 0.2015 | 6.814 | **0.0146** |
| 6-Cf x area | 27 | 96.4 | 0.05457 | 1.558 | 0.2226 |

**Table S3** Characterization of the water column of the Comau Fjord up to 6 meters of depth at two recording stations (Lilihuapi Island and Huinay Coastal Station). The information collected corresponds to a dataset available from the research Laudien et al. (2017). Data description: Physical oceanographic profiles of seven CTD casts for Comau Fjord in 2011. Alfred Wegener Institute, Helmholtz Centre for Polar and Marine Research, Bremerhaven, PANGAEA, <https://doi.org/10.1594/PANGAEA.884120>. Bentho-Pelagic Processes @ AWI (AWI_BPP) (URI: <https://www.awi.de/en/science/biosciences.html>).

| Site | Date/Time | Latitude | Longitude | Depth water  [m] | Temp  [°C] | Salinity  [PSU] | PAR  [µmol m-2s-1] | Average | | | **Attenuation PAR [%]** |
| --- | --- | --- | --- | --- | --- | --- | --- | --- | --- | --- | --- |
| Temp  [°C] | Salinity  [PSU] | PAR  [µmol m-2s-1] |
|  |
| Lilihuapi_2 | 2011-02-24T16:12 | -42.177 | -72.588 | 0.338 | 17.604 | 27.546 | 151.460 | 16.976±0.641 | 28.340±0.641 | 285.594±138.941 | **31.747** |  |
| Lilihuapi_2 | 2011-02-24T16:12 | -42.177 | -72.588 | 0.633 | 17.603 | 27.553 | 143.400 |  |  |  |  |  |
| Lilihuapi_2 | 2011-02-24T16:12 | -42.177 | -72.588 | 0.73 | 17.606 | 27.552 | 142.620 |  |  |  |  |  |
| Lilihuapi_2 | 2011-02-24T16:12 | -42.177 | -72.588 | 0.957 | 17.609 | 27.551 | 174.260 |  |  |  |  |  |
| Lilihuapi_2 | 2011-02-24T16:12 | -42.177 | -72.588 | 1.403 | 17.604 | 27.544 | 156.630 |  |  |  |  |  |
| Lilihuapi_2 | 2011-02-24T16:12 | -42.177 | -72.588 | 1.962 | 17.558 | 27.501 | 165.980 |  |  |  |  |  |
| Lilihuapi_2 | 2011-02-24T16:12 | -42.177 | -72.588 | 2.454 | 17.342 | 27.568 | 210.650 |  |  |  |  |  |
| Lilihuapi_2 | 2011-02-24T16:12 | -42.177 | -72.588 | 2.957 | 17.024 | 27.870 | 246.830 |  |  |  |  |  |
| Lilihuapi_2 | 2011-02-24T16:12 | -42.177 | -72.588 | 3.364 | 16.872 | 28.064 | 277.870 |  |  |  |  |  |
| Lilihuapi_2 | 2011-02-24T16:12 | -42.177 | -72.588 | 3.925 | 16.788 | 28.267 | 307.900 |  |  |  |  |  |
| Lilihuapi_2 | 2011-02-24T16:12 | -42.177 | -72.588 | 4.542 | 16.629 | 28.983 | 498.410 |  |  |  |  |  |
| Lilihuapi_2 | 2011-02-24T16:12 | -42.177 | -72.588 | 5.159 | 16.317 | 29.555 | 506.710 |  |  |  |  |  |
| Lilihuapi_2 | 2011-02-24T16:12 | -42.177 | -72.588 | 5.69 | 16.123 | 29.710 | 453.450 |  |  |  |  |  |
| Lilihuapi_2 | 2011-02-24T16:12 | -42.177 | -72.588 | 5.874 | 16.034 | 29.839 | 422.530 |  |  |  |  |  |
| Lilihuapi_2 | 2011-02-24T16:12 | -42.177 | -72.588 | 6.128 | 15.932 | 29.999 | 425.210 |  |  |  |  |  |
| X-Huinay_3 | 2011-03-08T16:02 | -42.390 | -72.447 | 0.269 | 18.937 | 22.574 | 94.750 | 18.555±0.406 | 24.342±1.786 | 194.926±32.281 |  |  |
| X-Huinay_3 | 2011-03-08T16:02 | -42.390 | -72.447 | 0.281 | 18.938 | 22.573 | 199.130 |  |  |  |  |  |
| X-Huinay_3 | 2011-03-08T16:02 | -42.390 | -72.447 | 0.38 | 18.938 | 22.572 | 188.510 |  |  |  |  |  |
| X-Huinay_3 | 2011-03-08T16:02 | -42.390 | -72.447 | 0.368 | 18.938 | 22.571 | 110.090 |  |  |  |  |  |
| X-Huinay_3 | 2011-03-08T16:02 | -42.390 | -72.447 | 0.591 | 18.939 | 22.571 | 179.230 |  |  |  |  |  |
| X-Huinay_3 | 2011-03-08T16:02 | -42.390 | -72.447 | 1.166 | 18.941 | 22.573 | 165.920 |  |  |  |  |  |
| X-Huinay_3 | 2011-03-08T16:02 | -42.390 | -72.447 | 1.796 | 18.941 | 22.571 | 183.730 |  |  |  |  |  |
| X-Huinay_3 | 2011-03-08T16:02 | -42.390 | -72.447 | 2.215 | 18.941 | 22.573 | 212.700 |  |  |  |  |  |
| X-Huinay_3 | 2011-03-08T16:02 | -42.390 | -72.447 | 2.707 | 18.942 | 22.577 | 225.360 |  |  |  |  |  |
| X-Huinay_3 | 2011-03-08T16:02 | -42.390 | -72.447 | 3.076 | 18.939 | 22.589 | 229.80 |  |  |  |  |  |
| X-Huinay_3 | 2011-03-08T16:02 | -42.390 | -72.447 | 3.585 | 18.934 | 22.623 | 219.030 |  |  |  |  |  |
| X-Huinay_3 | 2011-03-08T16:02 | -42.390 | -72.447 | 4.081 | 18.898 | 23.005 | 225.080 |  |  |  |  |  |
| X-Huinay_3 | 2011-03-08T16:02 | -42.390 | -72.447 | 4.447 | 18.788 | 23.618 | 225.400 |  |  |  |  |  |
| X-Huinay_3 | 2011-03-08T16:02 | -42.390 | -72.447 | 4.726 | 18.565 | 25.122 | 215.900 |  |  |  |  |  |
| X-Huinay_3 | 2011-03-08T16:02 | -42.390 | -72.447 | 5.027 | 18.305 | 25.957 | 203.200 |  |  |  |  |  |
| X-Huinay_3 | 2011-03-08T16:02 | -42.390 | -72.447 | 5.027 | 18.153 | 26.166 | 196.010 |  |  |  |  |  |
| X-Huinay_3 | 2011-03-08T16:02 | -42.390 | -72.447 | 5.027 | 18.107 | 26.191 | 202.060 |  |  |  |  |  |
| X-Huinay_3 | 2011-03-08T16:02 | -42.390 | -72.447 | 4.985 | 18.115 | 26.129 | 205.930 |  |  |  |  |  |
| X-Huinay_3 | 2011-03-08T16:02 | -42.390 | -72.447 | 5.021 | 18.120 | 26.066 | 206.510 |  |  |  |  |  |
| X-Huinay_3 | 2011-03-08T16:02 | -42.390 | -72.447 | 5.041 | 18.117 | 26.170 | 202.520 |  |  |  |  |  |
| X-Huinay_3 | 2011-03-08T16:02 | -42.390 | -72.447 | 5.027 | 18.099 | 26.234 | 199.690 |  |  |  |  |  |
| X-Huinay_3 | 2011-03-08T16:02 | -42.390 | -72.447 | 5.041 | 18.097 | 26.176 | 206.360 |  |  |  |  |  |
| X-Huinay_3 | 2011-03-08T16:02 | -42.390 | -72.447 | 5.168 | 18.102 | 26.178 | 208.950 |  |  |  |  |  |
| X-Huinay_3 | 2011-03-08T16:02 | -42.390 | -72.447 | 5.596 | 18.091 | 26.294 | 192.290 |  |  |  |  |  |
| X-Huinay_3 | 2011-03-08T16:02 | -42.390 | -72.447 | 6.087 | 17.991 | 26.876 | 175.000 |  |  |  |  |  |

**Table S4**. Results of analysis of variance (ANOVA) for comparisons between blade types (Apical and Basal) considering physiological characteristics for each sampling site of *M. pyrifera* in Comau Fjord (n = 8). Abbreviations: Lilihuapi Island (**1-LI**), Cahuelmo sector (**2-CCh**, **3-CCh**), Comau Fjord interior (**4-Cf**, **5-Cf** and **6-Cf**). The results of one-way ANOVA data are included (α = 0.05). *DF degrees of freedom, SE standard error, MS mean squares, F F statistic; P values in bold indicate significant differences (*p* < 0.05).

|  |  | ANOVA | | | | |
| --- | --- | --- | --- | --- | --- | --- |
| **Sites** | Variable | DF | SE | MS | F | Pr(>F) |
|  | ETRmax | 6 | 5.9760 | 0.1017 | 0.6790 | 0.4415 |
| 1-Li | α | 6 | 0.1118 | 0.0372 | 0.2321 | 0.6470 |
|  | Ek | 6 | 26.9100 | 0.0968 | 0.6427 | 0.4533 |
|  | ETRmax | 7 | 15.6500 | 0.1043 | 0.8147 | 0.3967 |
| 2-CCh | α | 7 | 0.1017 | 0.3907 | 4.4890 | 0.0719 |
|  | Ek | 7 | 48.3300 | 0.0506 | 0.3731 | 0.5606 |
|  | ETRmax | 10 | 17.6400 | 0.0005 | 0.0045 | 0.9477 |
| 3-CCh | α | 10 | 0.0671 | 0.0001 | 0.0002 | 0.9997 |
|  | Ek | 10 | 29.1700 | 0.0016 | 0.0159 | 0.9021 |
|  | ETRmax | 6 | 6.6660 | 0.0166 | 0.1015 | 0.7608 |
| 4-Cf | α | 6 | 0.1642 | 0.2318 | 1.8100 | 0.2271 |
|  | Ek | 6 | 76.5300 | 0.2240 | 1.7320 | 0.2362 |
|  | ETRmax | 6 | 10.8900 | 0.0279 | 0.1435 | 0.7204 |
| 5-Cf | α | 6 | 0.2266 | 0.1049 | 0.5863 | 0.4784 |
|  | Ek | 6 | 48.8800 | 0.1514 | 0.8923 | 0.3882 |
|  | ETRmax | 5 | 2.8590 | 0.2678 | 1.4630 | 0.2931 |
| 6-Cf | α | 5 | 0.1798 | 0.4458 | 3.2170 | 0.1473 |
|  | Ek | 5 | 12.6300 | 0.8251 | 18.8800 | **0.0122** |
